# Supplementary material
Source: PubMed Central journal article supplement (PMC5760287)
Supplement: NIHMS921941-supplement.pdf [file NIHMS921941-supplement.pdf]

Figure S1

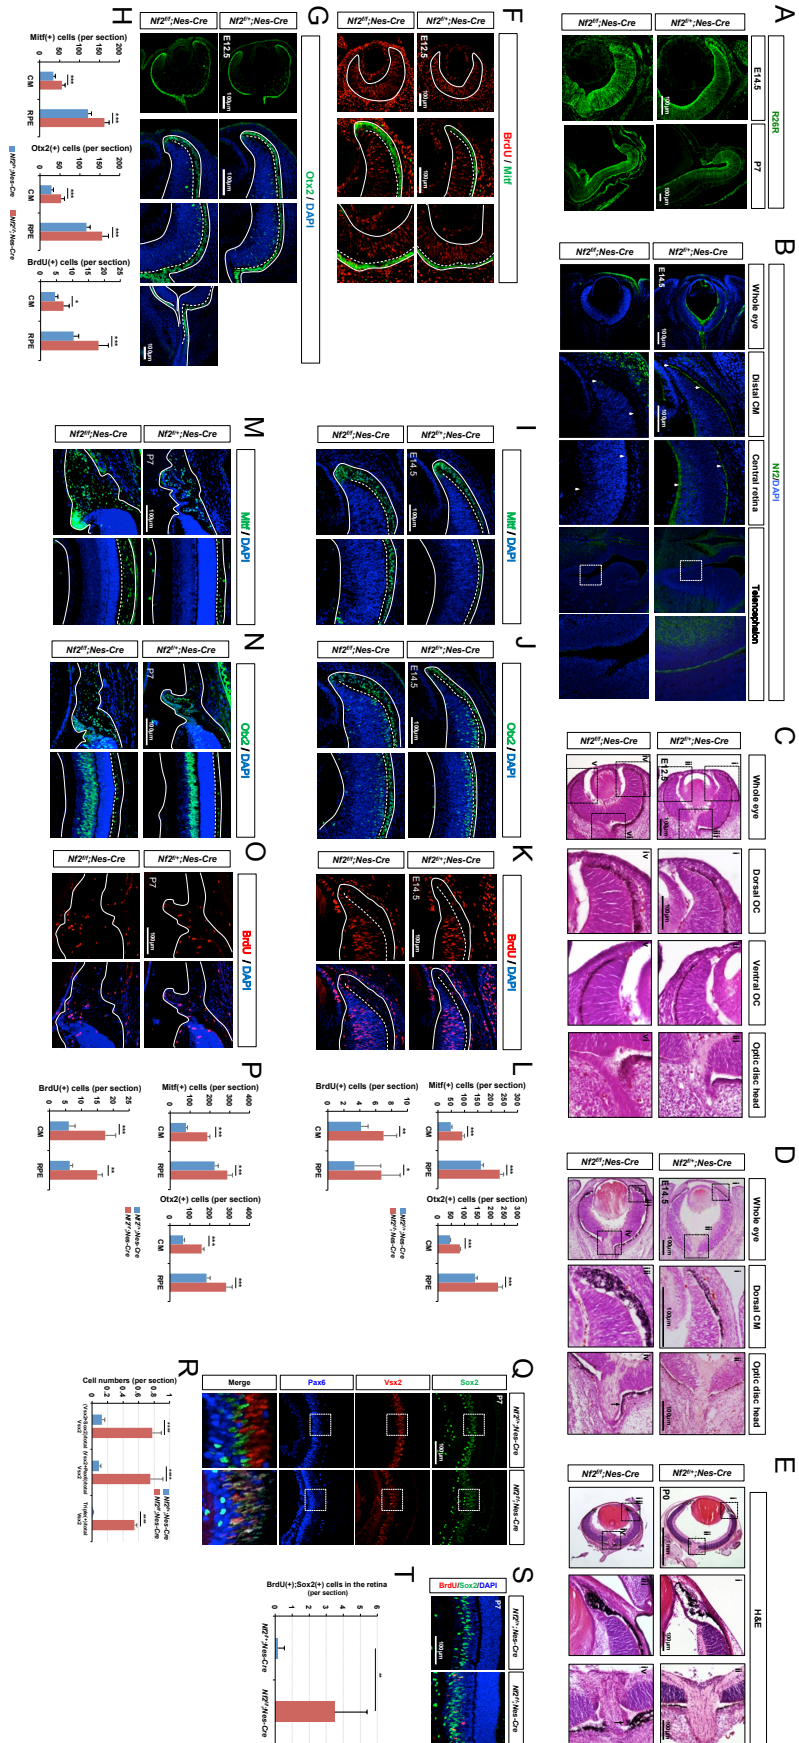

**Figure S1 (related to Figure 2). Expansion of pigmented epithelium and RPCs in *Nf2<sup>ff</sup>;Nes-Cre* mouse eyes.** (A) Cells underwent Cre recombinase-dependent gene deletion were visualized by immunostaining of  $\beta$ -galactosidase (R26R), which is expressed at *R26* locus. Note the majority of cells in the retina, CM, and RPE in *Nf2<sup>ff</sup>;Nes-Cre* mouse eyes are R26R-positive, implicating the deletion of *Nf2* in those cell populations. (B) Successful deletion of *Nf2* (green) was directly assessed by immunostaining of *Nf2* in the eye and brain sections. *Nf2* is absent in the optic cup and the brain of E14.5 *Nf2<sup>ff</sup>;Nes-Cre* mice, but it is present in the cornea of the eye. (C – E) H&E staining of eye sections from E12.5 (C), E14.5 (D), P0 (E) *Nf2<sup>f/+</sup>;Nes-Cre* and *Nf2<sup>ff</sup>;Nes-Cre* littermate mice. Images in right columns are magnified versions of the box areas correspondingly numbered in the images at leftmost columns. Eye sections from E12.5 (F), E14.5 (I), P7 (M) *Nf2<sup>f/+</sup>;Nes-Cre* and *Nf2<sup>ff</sup>;Nes-Cre* littermate mice were stained with an antibody against a pigmented cell marker *Mitf* alone (green; I and M) or together with an antibody against BrdU (red; F, K, and O). Dot-lines indicate the borders between RPE and retina. The sections were also stained for detecting a RPE marker *Otx2* (green; G, J, and N). Nuclei of the cells were visualized by DAPI staining (blue). (H, L, P) Quantification of *Otx2*-, *Mitf*-, and *Mitf*;BrdU-positive pigmented cells in E12.5 (H), E14.5 (L), P7 (P) *Nf2<sup>f/+</sup>;Nes-Cre* and *Nf2<sup>ff</sup>;Nes-Cre* littermate mouse eyes (n = 5 from 3 independent litters). (Q) Eye sections of P7 *Nf2<sup>f/+</sup>;Nes-Cre* and *Nf2<sup>ff</sup>;Nes-Cre* littermate mice were also stained for detecting RPCs, which co-express *Sox2* (green), *Vsx2* (red), and *Pax6* (blue). Note that those markers are expressed separately in the Müller glia (positive to *Sox2*), bipolar cells (positive to *Vsx2*), and amacrine cells (positive to *Pax6* and *Sox2* subpopulation) in P7 *Nf2<sup>f/+</sup>;Nes-Cre* mouse retinas. (R) Quantification of the RPC population in the retinas (n = 5 from 3 independent litters). (S) Proliferation of RPC in P7 *Nf2<sup>f/+</sup>;Nestin-Cre* and *Nf2<sup>ff</sup>;Nestin-Cre* mouse retinas was determined by detecting cells co-expressing a RPC marker *Sox2* (green) and BrdU-labeled DNA (red). (T) Quantification of BrdU;*Sox2* double-positive proliferating RPCs in P7 *Nf2<sup>f/+</sup>;Nes-Cre* and *Nf2<sup>ff</sup>;Nes-Cre* littermate mouse retinas (n = 5 from 3 independent litters). Error bars in the graphs of this figure represent mean  $\pm$  SEM. P-values were obtained by Student's two-tailed unpaired t-test. \*p < 0.05 ; \*\*p < 0.01 ; \*\*\*p < 0.005; \*\*\*\*p < 0.001.

Figure S2

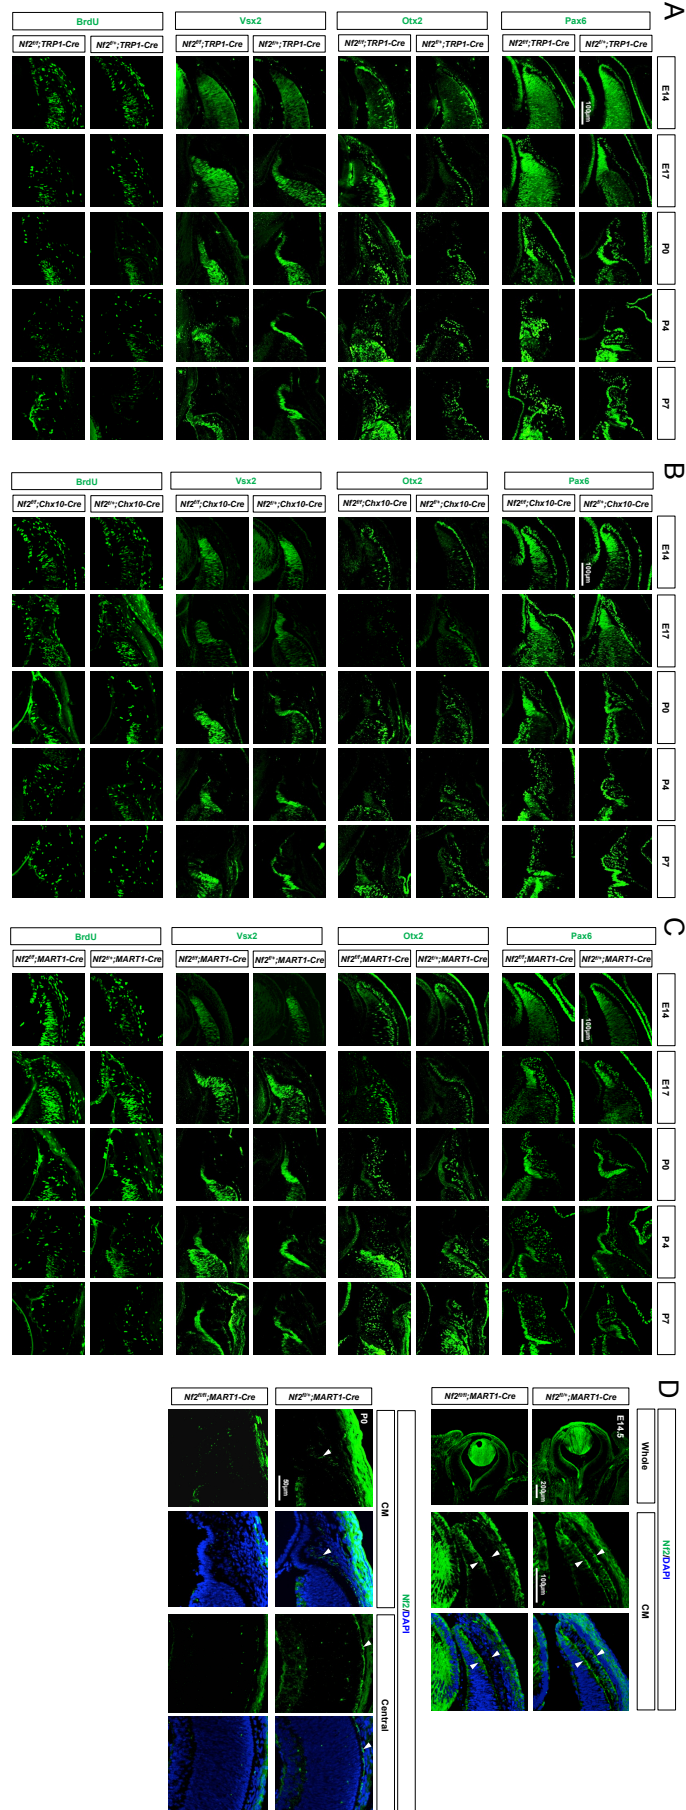

**Figure S2 (related to Figure 3 and 4). Distribution of CM, ICM, and OCM markers in the mouse eyes deleted *Nf2* in different optic neuroepithelial compartments. (A, B, C)** Sections of mouse eyes with corresponding genotypes at indicated ages were stained with antibodies detecting pan-CM marker Pax6, OCM/RPE marker Otx2, and ICM/RPC marker Vsx2. Cell proliferation in the eye sections were determined by immunodetection of the cells containing DNA, which were incorporated with BrdU for 2h. **(D)** Successful deletion of *Nf2* (green) was confirmed by immunostaining of *Nf2* in the *Nf2<sup>fl/+</sup>;MART1-Cre* and *Nf2<sup>fl/fl</sup>;MART1-Cre* eyes at indicated period. *Nf2* was absent in the OCM/RPE or PCE/RPE of *Nf2<sup>fl/fl</sup>;MART1-Cre* mice.

Figure S3

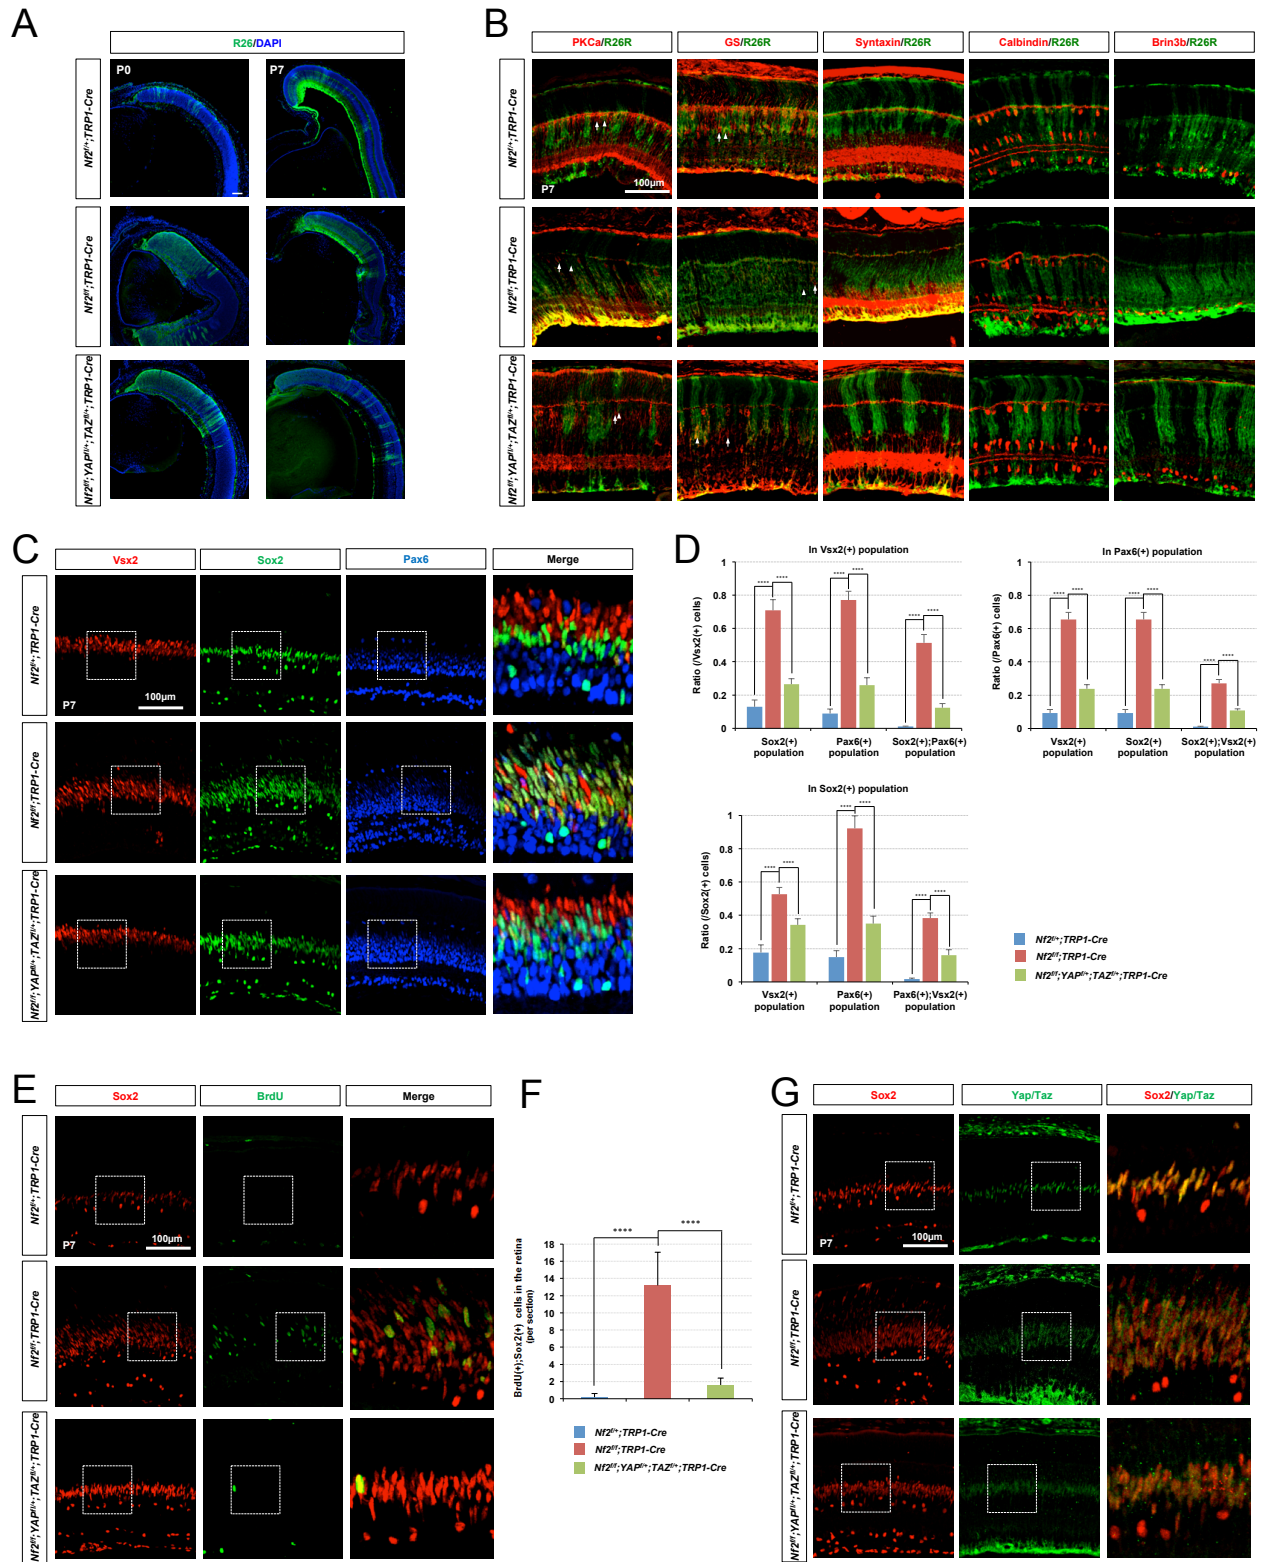

**Figure S3 (related to Figure 3). Expansion of the CM-derived RPC population in *Nf2<sup>ff</sup>;TRP1-Cre* mouse retinas.** (A) Distribution of cells underwent Cre-dependent DNA recombination was examined by immunostaining of  $\beta$ -galactosidase expressed at *R26R* Cre reporter locus. (B) Eye sections of P7 *Nf2<sup>ff</sup>;TRP1-Cre*, *Nf2<sup>ff</sup>;TRP1-Cre*, and *Nf2<sup>ff</sup>;YAP<sup>f/+</sup>;TAZ<sup>f/+</sup>;TRP1-Cre* mice were stained with the antibodies detecting retinal cell type-specific markers. Note that the *Nf2<sup>ff</sup>;TRP1-Cre* retinas are devoid of late-born neurons, such as rod bipolar cells (positive to PKC $\alpha$ ) and Müller glia (positive to GS) in R26R-positive cell population (arrowheads). However, those two late-born retinal cells were recovered in the *Nf2<sup>ff</sup>;YAP<sup>f/+</sup>;TAZ<sup>f/+</sup>;TRP1-Cre* mouse retinas. (C) The sections were stained for detecting RPCs, which co-express Sox2 (green), Vsx2 (red), and Pax6 (blue). Note that those markers are expressed separately in the Müller glia (positive to Sox2), bipolar cells (positive to Vsx2), and amacrine cells (positive to Pax6 and Sox2 subpopulation) in P7 *Nf2<sup>ff</sup>;TRP1-Cre* mouse retinas. (D) Quantification of the RPCs in the mouse retinas (n = 6 from 3 independent litters). Error bars in those graphs represent mean  $\pm$  SEM. P-values were obtained by Student's two-tailed unpaired t-test. \*\*\*\* p < 0.001. (E) Proliferation of RPCs in P7 *Nf2<sup>ff</sup>;TRP1-Cre*, *Nf2<sup>ff</sup>;TRP1-Cre*, and *Nf2<sup>ff</sup>;YAP<sup>f/+</sup>;TAZ<sup>f/+</sup>;TRP1-Cre* mouse retinas were determined by detecting cells co-expressing a RPC marker Sox2 (red) and BrdU-labeled DNA (green). Note P7 *Nf2<sup>ff</sup>;TRP1-Cre* retinas maintained Sox2;BrdU double-positive cells in the central part as well as peripheral part, whereas *Nf2<sup>ff</sup>;TRP1-Cre* littermate mouse retinas showed the BrdU-positive cells only in the peripheral part (data not shown). (F) Quantification of the BrdU;Sox2(+) cells in the mouse retinas (n = 6 from 3 independent litters). Error bars in those graphs represent mean  $\pm$  SEM. P-values were obtained by Student's two-tailed unpaired t-test. \*\*\*\* p < 0.001. (G) Yap/Taz expression in P7 *Nf2<sup>ff</sup>;TRP1-Cre*, *Nf2<sup>ff</sup>;TRP1-Cre*, and *Nf2<sup>ff</sup>;YAP<sup>f/+</sup>;TAZ<sup>f/+</sup>;TRP1-Cre* mouse retinas was analyzed by immunostaining. Note Yap/Taz-positive cells (green) are positive to Sox2 (red), which are expressed in Müller glia in the *Nf2<sup>ff</sup>;TRP1-Cre* mouse retinas but RPCs in the *Nf2<sup>ff</sup>;TRP1-Cre* mouse retinas.

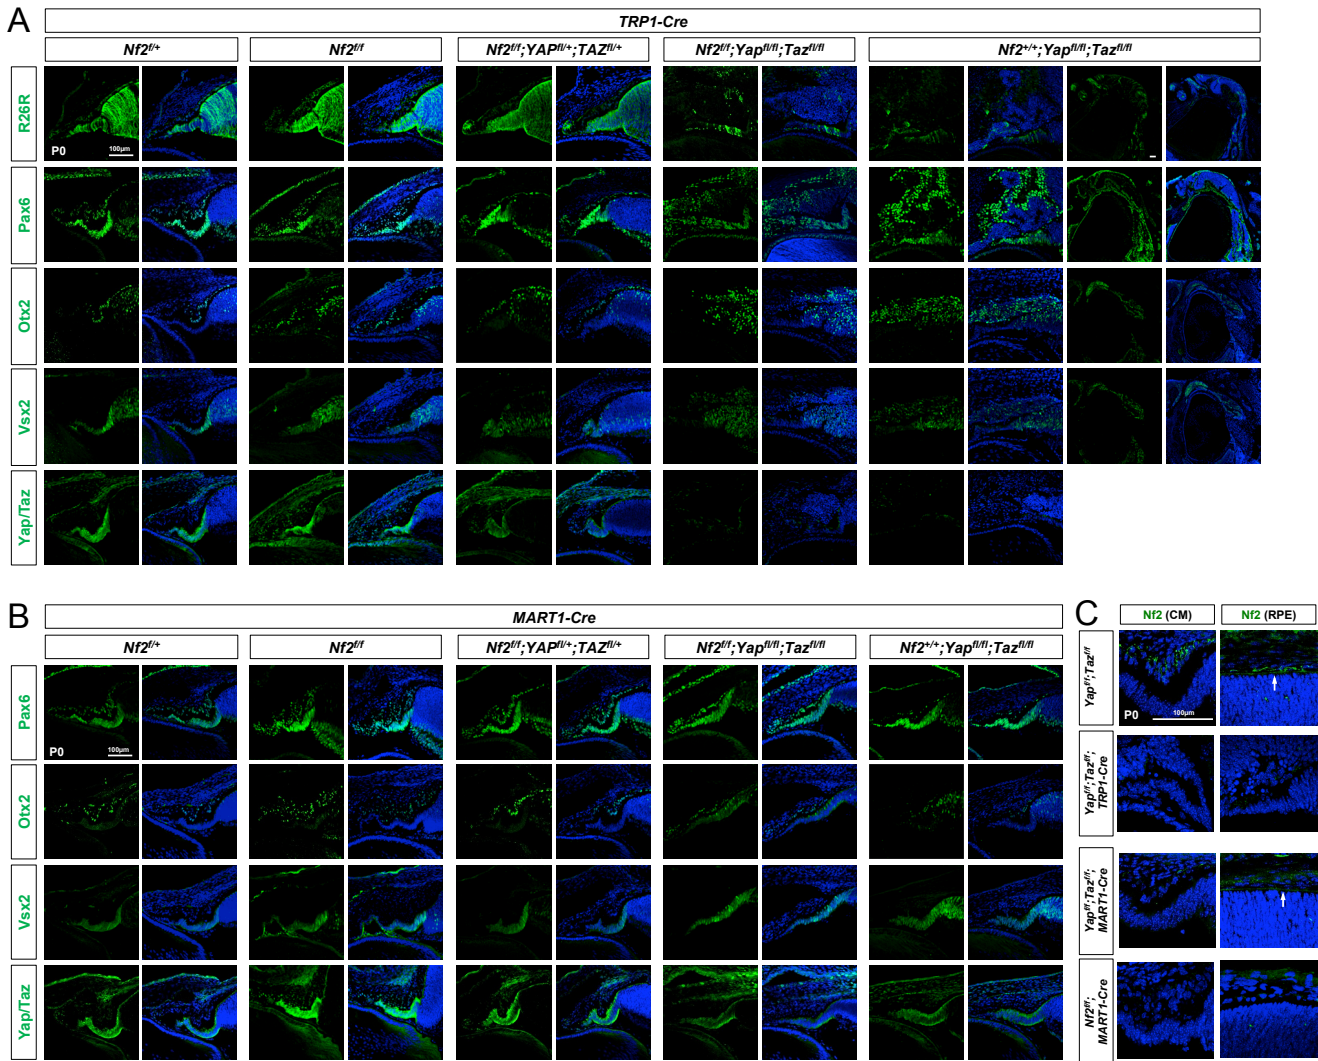

**Figure S4 (related Figure 6). Distribution of CM, ICM, and OCM markers in the mouse eyes deleted *Nf2* and *Yap/Taz* in different optic neuroepithelial compartments. (A and B) Sections of P0 eyes with indicated genotypes were stained with antibodies against Pax6, Otx2, Vsx2, and Yap/Taz. Cre-mediated recombination in the retinas was also visualized by detecting  $\beta$ -galactosidase expressed at the *R26R* Cre recombinase reporter gene locus (top rows, A). (C) The eye sections were stained with an anti-*Nf2* antibody (green) to visualize *Nf2* in the CM and RPE. Arrowheads indicate *Nf2* expressed in the RPE.**

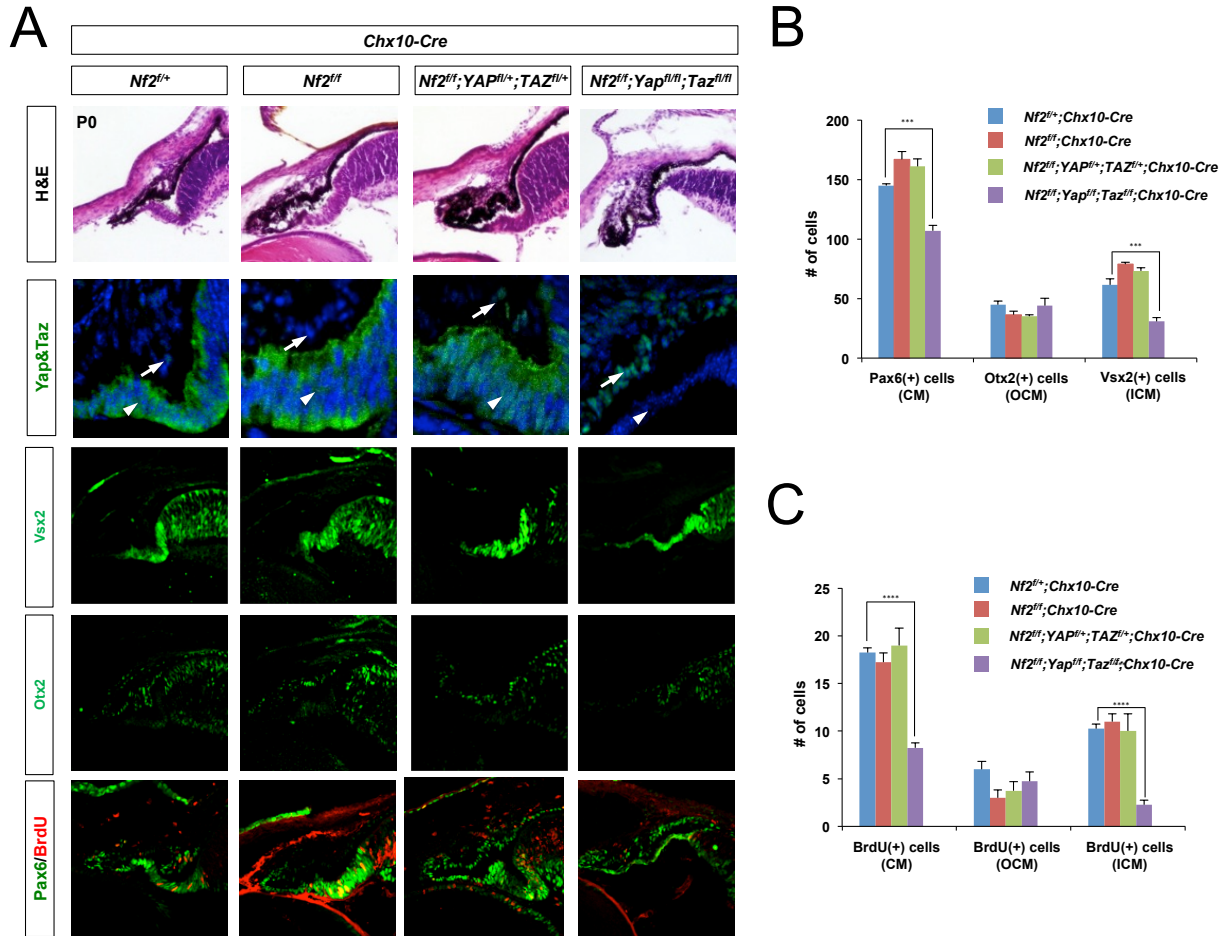

**Figure S5 (related to Figure 6). *Yap/Taz* deficiency results in ICM hypoplasia. (A)** H&E staining images of P0 *Nf2<sup>fl/+</sup>;Chx10-Cre*, *Nf2<sup>fl/fl</sup>;Chx10-Cre*, *Nf2<sup>fl/fl</sup>;YAP<sup>fl/+</sup>;TAZ<sup>fl/+</sup>;Chx10-Cre*, and *Nf2<sup>fl/fl</sup>;Yap<sup>fl/fl</sup>;Taz<sup>fl/fl</sup>;Chx10-Cre* mouse eye sections. The sections were also stained with antibodies detecting pan-CM marker Pax6, OCM/RPE marker Otx2, and ICM/RPC marker Vsx2. The proliferating cells in the eye sections were determined by detecting cells containing DNA, which were incorporated with BrdU for 2h. **(B)** Pax6-positive total CM cells, Otx2-positive OCM cells, and Vsx2-positive ICM cells in the P0 mouse eyes with indicated genotypes are quantified. **(C)** Quantification of Pax6;BrdU-positive cells among total CM cells, OCM cells, and ICM cells in P0 mouse eyes with indicated genotypes. Error bars in the graphs represent mean  $\pm$  SEM (n=6, 3 independent litters). P-values were obtained by Student's two-tailed unpaired *t*-test. \*\*p < 0.01; \*\*\*p<0.005; \*\*\*\*p < 0.001.



Figure S6

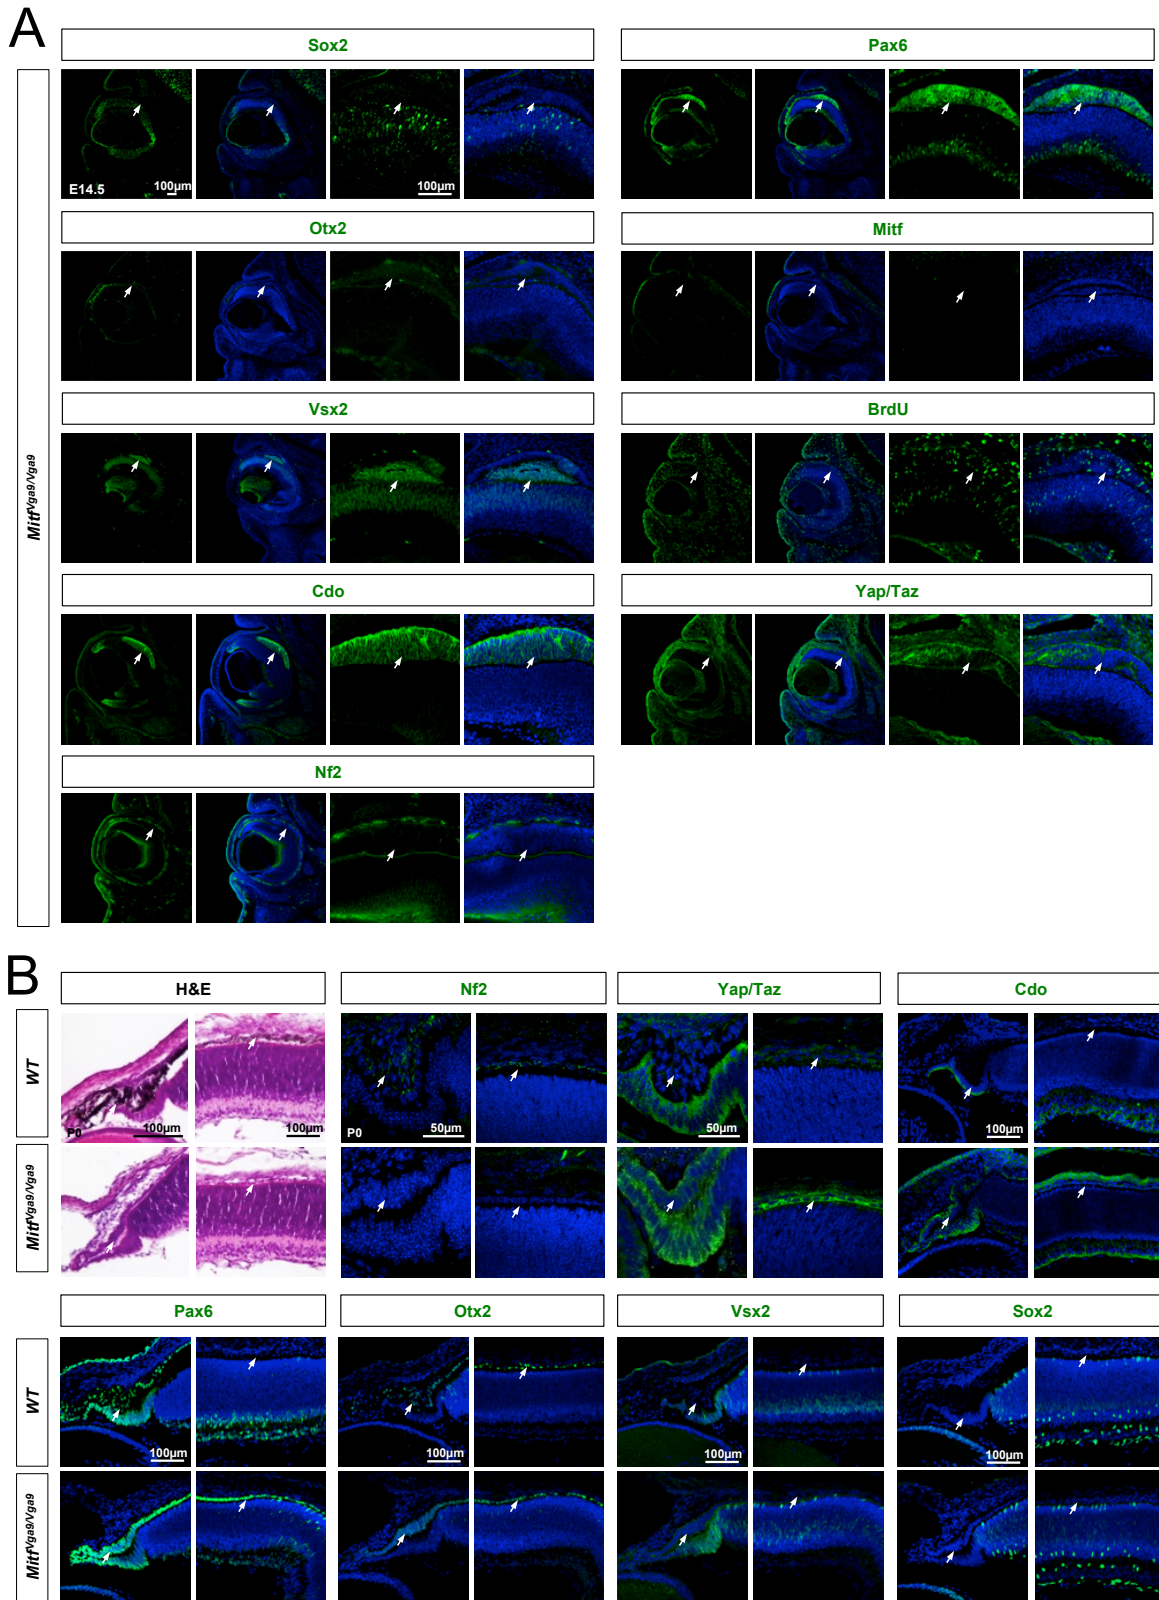

**Figure S6 (related to Figure 7). Transformation of RPE and OCM into ICM in *Mitf*<sup>Vga9/Vga9</sup> mouse eyes.** (A) Sections of E14.5 *Mitf*<sup>Vga9/Vga9</sup> mouse eyes were stained with antibodies against indicated markers (green). Nuclei of the cells were visualized by DAPI staining (blue). White arrows indicate presence or absence of each marker on the ectopic ICM in the central outer optic cup. (B) Sections of P0 *WT* and *Mitf*<sup>Vga9/Vga9</sup> littermate mouse eyes were stained with antibodies against indicated markers (green). White arrows indicate the ectopic ICM in the central outer optic cup of the *Mitf*<sup>Vga9/Vga9</sup> mouse eyes.

Figure S7

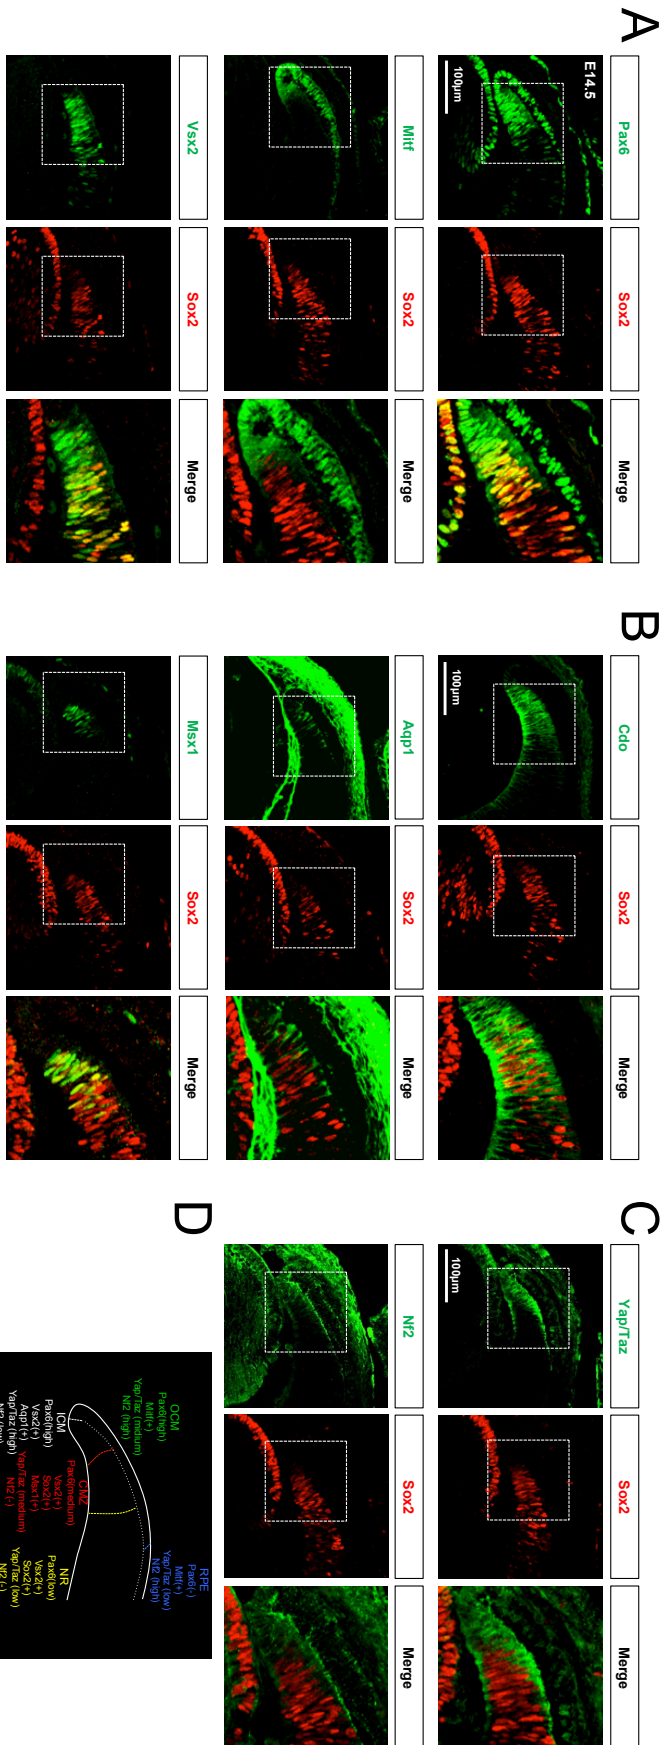

**Figure S7 (related to Figure 7). Sox2 expression in RPC population in the proximal ICM and retina.** Sections of E14.5 wild-type mouse eyes (C57BL/6J) were stained with goat anti-Sox2 (red) and antibodies detecting the indicated markers (green). **(A)** Sox2 is expressed in subpopulation of Pax6- or Vsx2-positive cells in the proximal ICM and retina (top and bottom), but is not expressed in Mitf-positive cells in the OCM and RPE (middle). **(B)** Sox2 is detectable at high in subpopulation of Cdo-positive ICM, but at low in Aqp1-positive distal ICM subpopulation. Majority of Msx1-positive cells in the proximal ICM co-express Sox2. **(C)** Sox2 is largely negative in ICM cells expressing Yap/Taz and Nf2. **(D)** Schematic diagram displays the markers expressed in each optic neuroepithelial compartment of mouse embryonic eye.
